# Supplementary material for: Modulation of Aneuploidy in Leishmania donovani during Adaptation to Different In Vitro and In Vivo Environments and Its Impact on Gene Expression
Source: PubMed Central journal article supplement (PMC5442457; doi:10.1128/mbio.00599-17), 2017-05-23
Supplement: mbo003173320sf1.pdf [file mbo003173320sf1.pdf]

S1A

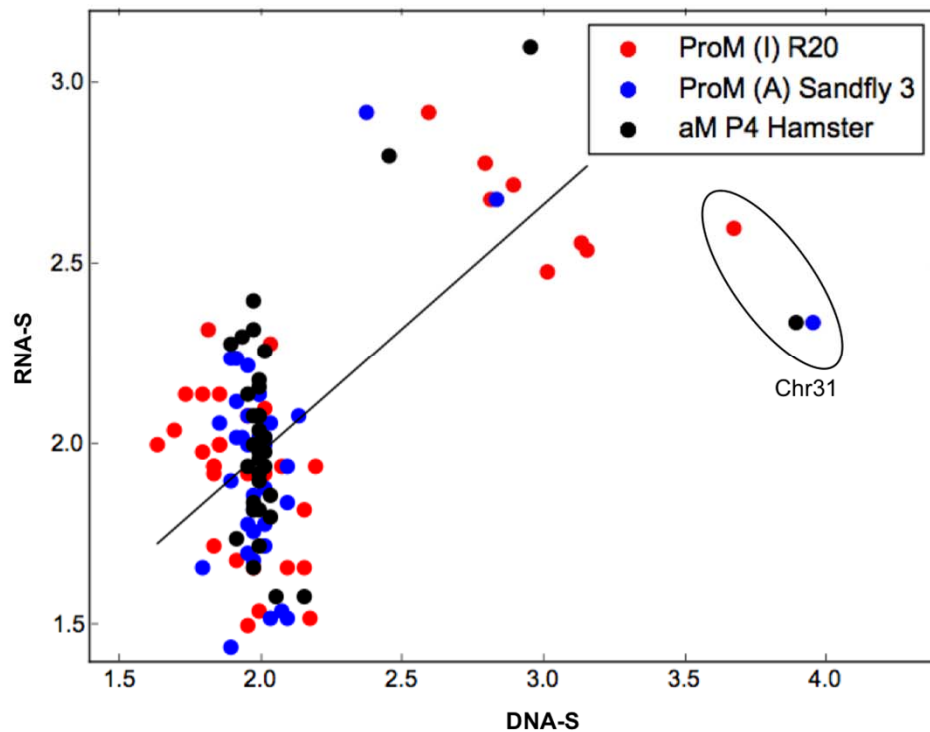

S1B

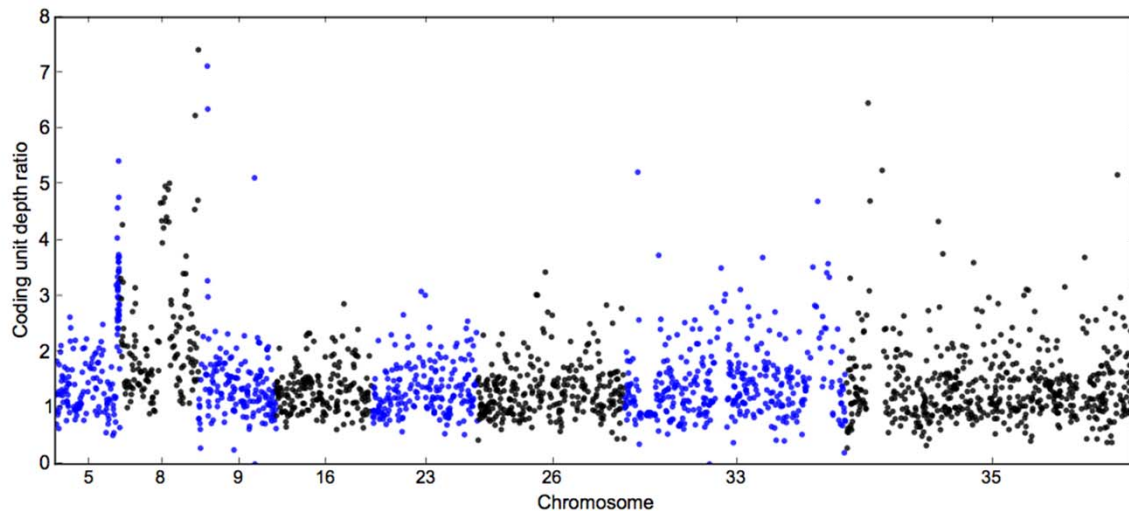

**Figure S1. A. Correlation between *S* and *RNA-S* during adaptation to different life stages/environments** The correlation coefficient between *S* and *RNA-S* in promastigotes (in vitro and from sand fly) and amastigotes was  $r = 0.65$  ( $p$ -value  $7.7 \cdot 10^{-12}$ ). Chromosome 31 some values were excluded for the correlation calculation but were included in the scattering plot to illustrate their behaviour.

**B. Manhattan plot for Individual gene expression in promastigotes showing variable aneuploidy.** Samples considered here are: ProM (I) 20, ProM (P) Sandfly 3, Prom (A) R3, ProM (A) R10. These samples represent the same life stage, but they differ in some of chromosomes: 5, 8, 9, 16, 23, 26, 33 and 35. RNA depth ratios between trisomic and disomic groups in these chromosomes are shown: the x-axis represents each coding unit along chromosomes and the y-axis the average RNA depth ratios. Colours of dots were alternated for each chromosome.
