# Supplementary material for: Modulation of Aneuploidy in Leishmania donovani during Adaptation to Different In Vitro and In Vivo Environments and Its Impact on Gene Expression
Source: PubMed Central journal article supplement (PMC5442457; doi:10.1128/mbio.00599-17), 2017-05-23
Supplement: mbo003173320st1.pdf [file mbo003173320st1.pdf]

Supplementary Table S1A

| Sample ID             | Sample ID2          | Library preparation method | Analysis |      |                | Average Depth* | Norm. Std.* |
|-----------------------|---------------------|----------------------------|----------|------|----------------|----------------|-------------|
|                       |                     |                            | Ploidy   | SNP  | CNV/gene depth |                |             |
| aM P3 Hamster         | BPK282siQ17         | TruSeq                     | used     | used | used           | 63.9           | 0.132       |
| aM P4 Hamster         | BPK282siR18         | TruSeq                     | used     | used | used           | 13.7           | 0.204       |
| ProM (A) R3           | BPK282siT20         | TruSeq                     | used     | used | used           | 32.1           | 0.167       |
| ProM (A) R10          | BPK282siA27         | TruSeq                     | used     | used | used           | 13.6           | 0.181       |
| ProM (P) Sandfly 1    | BPK282siU21         | TruSeq                     | used     | used | used           | 46.2           | 0.143       |
|                       | BPK282_Fly_P0_1     | Nextera                    | no       | used | used           | 45.7           | 0.204       |
| ProM (P) Sandfly 2    | BPK282siV22         | TruSeq                     | used     | used | used           | 84.3           | 0.166       |
|                       | BPK282_Fly_P0_2     | Nextera                    | no       | used | used           | 43.5           | 0.219       |
| ProM (P) Sandfly 3    | BPK282siW23         | TruSeq                     | used     | used | used           | 35.2           | 0.2         |
|                       | BPK282_Fly_P0_3     | Nextera                    | no       | used | used           | 60.3           | 0.201       |
| ProM (A) Sandfly 1    | BPK282_Ama_to_fly-1 | Nextera                    | used     | used | used           | 106            | 0.202       |
|                       | BPK282siX24         | TruSeq                     | no       | used | no             | 4.7            | 0.552       |
| ProM (A) Sandfly 2    | BPK282_Ama_to_fly-2 | Nextera                    | used     | used | used           | 65.4           | 0.215       |
|                       | BPK282siY25         | TruSeq                     | no       | used | no             | 8.2            | 0.412       |
| ProM (A) Sandfly 3    | BPK282_Ama_to_fly-3 | Nextera                    | used     | used | used           | 72.5           | 0.2         |
|                       | BPK282siZ26         | TruSeq                     | no       | used | no             | 9.9            | 0.49        |
| ProM (I) R20          | BPK282siP16         | TruSeq                     | used     | used | used           | 65.3           | 0.375       |
| ProM (I) R22          | BPK282siS19         | TruSeq                     | used     | used | used           | 16.3           | 0.489       |
|                       | BPK282_Pro_B_fly    | Nextera                    | no       | used | used           | 63             | 0.347       |
| aM (P/sf) P1 Hamster  | BPK282siB28         | TruSeq                     | used     | used | no             | 2.2            | 0.13        |
| 275ProM (I) R33       | BPK275si2A1         | TruSeq                     | used     | used | used           | 16.2           | 0.54        |
|                       | BPK275_Pro_B_fly    | Nextera                    | no       | used | used           | 13             | 0.53        |
| 275ProM (P) Sandfly 1 | BPK275si2B2         | TruSeq                     | used     | used | used           | 52.5           | 0.16        |
|                       | BPK275_Fly_P0_1     | Nextera                    | no       | used | no             | 33.3           | 0.224       |

|                         |                 |                     |      |      |      |       |       |
|-------------------------|-----------------|---------------------|------|------|------|-------|-------|
| 275ProM (P) Sandfly 2   | BPK275si2C3     | TruSeq              | no   | used | no   | 13    | 0.347 |
|                         | BPK275_Fly_P0_2 | Nextera             | used | used | used | 81.2  | 0.19  |
| 275ProM (P) Sandfly 3   | BPK275si2D4     | TruSeq              | used | used | used | 36.5  | 0.16  |
|                         | BPK275_Fly_P0_3 | Nextera             | no   | used | no   | 54.4  | 0.232 |
| 275aM (P/sf) P1 Hamster | BPK275si2E5     | TruSeq              | used | used | no   | 4.3   | 0.414 |
| 1SaM P15 Hamster        | Ld1S_ama        | KAPA Hyper Prep Kit | used | no   | no   | 68.5  | 0.224 |
| 1SProM (A) Sandfly 1    | Ld1S_amasf2     | KAPA Hyper Prep Kit | used | no   | no   | 109.8 | 0.203 |
| 1SProM (A) Sandfly 2    | Ld1S_amasf5     | KAPA Hyper Prep Kit | used | no   | no   | 110   | 0.204 |
| 1SProM (A) Sandfly 3    | Ld1S_amasf6     | KAPA Hyper Prep Kit | used | no   | no   | 74.6  | 0.239 |
| 1SProM (I) R22          | Ld1S_p22        | KAPA Hyper Prep Kit | used | no   | no   | 81.4  | 0.204 |
| 1SProM (P) Sandfly 1    | Ld1S_p22sf5     | KAPA Hyper Prep Kit | used | no   | no   | 125   | 0.194 |
| 1SProM (P) Sandfly 2    | Ld1S_p22sf7     | KAPA Hyper Prep Kit | used | no   | no   | 129.6 | 0.194 |
| 1SProM (P) Sandfly 3    | Ld1S_p22sf11    | KAPA Hyper Prep Kit | used | no   | no   | 135.5 | 0.182 |

\*=These values are based on depth without binning to estimate overall sequence quality.

Supplementary Table S1B

| Sample ID               | Sample ID2           | Total (million) | Mapped (million) | (%)  | Mapped in pair (million) | (%)  | Singletons (million) | (%) | Median depth* | Average depth* | Norm. depth standard deviation* |
|-------------------------|----------------------|-----------------|------------------|------|--------------------------|------|----------------------|-----|---------------|----------------|---------------------------------|
| ProM (I) R20            | BPK282RNAsiA1        | 36              | 35.29            | 98   | 34.67                    | 96.3 | 0.62                 | 1.7 | 42.9          | 49.6           | 0.69                            |
| aM P3 Hamster           | BPK282RNAsiB2        | 38.15           | 37.31            | 97.8 | 36.63                    | 96   | 0.68                 | 1.8 | 46.0          | 52.8           | 0.70                            |
| aM P4 Hamster           | BPK282RNAsiC3        | 18.1            | 16.31            | 90.1 | 15.81                    | 87.3 | 0.5                  | 2.8 | 16.3          | 19.9           | 0.76                            |
| ProM (A) R3             | BPK282RNAsiE5        | 35.4            | 34.66            | 97.9 | 33.98                    | 96   | 0.67                 | 1.9 | 35.6          | 44.2           | 0.79                            |
| ProM (A) R10            | BPK282RNAsiF6        | 30.9            | 30.22            | 97.8 | 29.6                     | 95.8 | 0.62                 | 2   | 29.7          | 38.0           | 0.83                            |
| ProM (P) Sandfly 3      | BPK282RNAsiG7        | 30.12           | 29.41            | 97.6 | 28.9                     | 96   | 0.51                 | 1.7 | 33.9          | 40.6           | 0.74                            |
| aM (P/sf) P1 Hamster    | BPK282RNAsiH8        | 39.82           | 37.19            | 93.4 | 36.55                    | 91.8 | 0.64                 | 1.6 | 43.2          | 50.6           | 0.73                            |
| ProM (A) Sandfly 3      | BPK282RNAsiI9        | 16.25           | 12.32            | 75.8 | 12.02                    | 74   | 0.3                  | 1.8 | 6.1           | 8.0            | 0.83                            |
| 275ProM (I) R33         | BPK275RNAsiA1        | 33.15           | 32.51            | 98.1 | 31.95                    | 96.4 | 0.57                 | 1.7 | 42.5          | 47.8           | 0.67                            |
| 275ProM (P) Sandfly 2   | BPK275RNAsiB2        | 34.79           | 34.11            | 98   | 33.53                    | 96.4 | 0.58                 | 1.7 | 41.0          | 48.0           | 0.73                            |
| 275aM (P/sf) P1 Hamster | BPK275RNAsiC3        | 18.6            | 16.35            | 87.9 | 16.06                    | 86.4 | 0.29                 | 1.5 | 20.8          | 24.0           | 0.70                            |
|                         | Total mapped reads   | 331.3           | 315.7            |      |                          |      |                      |     |               |                |                                 |
|                         | Average mapped reads | 30.1            | 28.7             |      |                          |      |                      |     |               |                |                                 |

\*=These values are based on depth without binning to estimate overall sequence quality.

Read length =75bp
