# Supplementary material for: Modulation of Aneuploidy in Leishmania donovani during Adaptation to Different In Vitro and In Vivo Environments and Its Impact on Gene Expression
Source: PubMed Central journal article supplement (PMC5442457; doi:10.1128/mbio.00599-17), 2017-05-23
Supplement: mbo003173320st2.pdf [file mbo003173320st2.pdf]

|                     |                                                                    | 0.132            | 0.204            | 0.167          | 0.181           | 0.143                 | 0.166                 | 0.200                 | 0.202                 | 0.215                 | 0.200                 |
|---------------------|--------------------------------------------------------------------|------------------|------------------|----------------|-----------------|-----------------------|-----------------------|-----------------------|-----------------------|-----------------------|-----------------------|
| Norm std            |                                                                    |                  |                  |                |                 |                       |                       |                       |                       |                       |                       |
| DEPTH               |                                                                    | 63.92            | 13.705           | 32.13          | 13.585          | 46.195                | 84.31                 | 35.23                 | 106.04                | 65.43                 | 72.51                 |
|                     |                                                                    | aM P3<br>Hamster | aM P4<br>Hamster | ProM<br>(A) R3 | ProM (A)<br>R10 | ProM (P)<br>Sandfly 1 | ProM (P)<br>Sandfly 2 | ProM (P)<br>Sandfly 3 | ProM (A)<br>Sandfly 1 | ProM (A)<br>Sandfly 2 | ProM (A)<br>Sandfly 3 |
| Library prep        |                                                                    |                  |                  |                |                 |                       |                       |                       | N                     | N                     | N                     |
| H-locus             | LdBPK_230007600: hypotheticalprotein,conserved                     | 2.877            | 2.643            | 3.281          | 3               | 2.875                 | 2.882                 | 2.815                 | 3.213                 | 3.329                 | 3.143                 |
|                     | LdBPK_230007700: terbinafineresistancelocusprotein_yip1_           | 3                | 2.571            | 2.781          | 2.652           | 2.694                 | 2.669                 | 2.741                 | 2.567                 | 2.572                 | 2.766                 |
|                     | LdBPK_230007800: pentamidineresistanceprotein1                     | 2.862            | 2.786            | 3.062          | 2.783           | 2.625                 | 2.803                 | 2.63                  | 2.779                 | 2.814                 | 2.636                 |
|                     | LdBPK_230007900: argininosuccinatesynthase,putative                | 3.031            | 2.786            | 2.812          | 2.522           | 2.597                 | 2.834                 | 2.407                 | 3.089                 | 3.429                 | 3.26                  |
|                     | Average for H-locus                                                | 2.9425           | 2.6965           | 2.984          | 2.73925         | 2.69775               | 2.797                 | 2.64825               | 2.912                 | 3.036                 | 2.95125               |
| M-locus             | LdBPK_360076600: tartrate-sensitiveacidphosphataseacp-3.2,putative | 3.892            | 4.643            | 4.367          | 4.727           | 4.273                 | 5.458                 | 4.625                 | 6.699                 | 7.622                 | 6.708                 |
|                     | LdBPK_360076700: hypotheticalprotein,conserved                     | 8.092            | 8.143            | 7.433          | 7.409           | 7.364                 | 8.688                 | 9.75                  | 6.265                 | 6.228                 | 6.333                 |
|                     | LdBPK_360076800: mitogen-activatedproteinkinase                    | 15.661           | 15.072           | 13.933         | 15.319          | 14.5                  | 12.417                | 14.937                | 14.803                | 15.258                | 15.568                |
|                     | LdBPK_360076900: histidinesecretoryacidphosphatase,putative        | 13.323           | 13.072           | 13.6           | 12.955          | 13.023                | 17.632                | 13.937                | 12.86                 | 13.91                 | 12.694                |
|                     | LdBPK_360077000: hypotheticalprotein,conserved                     | 7.538            | 7.786            | 7.233          | 7.591           | 7.932                 | 8.093                 | 9.937                 | 6.133                 | 6.319                 | 6.444                 |
|                     | Average for M-locus                                                | 9.7012           | 9.7432           | 9.3132         | 9.6002          | 9.4184                | 10.4576               | 10.6372               | 9.352                 | 9.8674                | 9.5494                |
| Ch6 - Yeti amplicon | LdBPK_060014000: hypotheticalprotein,conserved                     | 1.016            | 0.923            | 1.061          | 1.136           | 0.896                 | 0.989                 | 0.778                 | 0.971                 | 1                     | 0.829                 |
|                     | LdBPK_060014100: hypotheticalprotein,conserved                     | 0.984            | 0.923            | 1.03           | 1               | 0.917                 | 1.119                 | 0.944                 | 0.853                 | 0.839                 | 0.843                 |
|                     | LdBPK_060014200: dihydrofolatereductase-thymidylatesynthase        | 0.984            | 0.769            | 0.909          | 0.955           | 0.937                 | 0.989                 | 0.944                 | 0.961                 | 0.968                 | 0.986                 |
|                     | LdBPK_060014300: arginineN-methyltransferase,typeIII,putative      | 1.081            | 0.923            | 1.061          | 1               | 1.021                 | 0.891                 | 1.056                 | 0.951                 | 0.952                 | 0.914                 |
|                     | LdBPK_060014400: acyl-coenzymeadehydrogenase,putative              | 0.871            | 0.846            | 0.849          | 0.955           | 0.812                 | 0.848                 | 0.778                 | 0.922                 | 1                     | 0.943                 |
|                     | Average for Yeti amplicon                                          | 0.9872           | 0.8768           | 0.982          | 1.0092          | 0.9166                | 0.9672                | 0.9                   | 0.9316                | 0.9518                | 0.903                 |

Table S2A

| Chr                            | Ld24              |         | Ld32              |         | Ld32                                    |         | Ld35                                            |         | Ld35                   |         |
|--------------------------------|-------------------|---------|-------------------|---------|-----------------------------------------|---------|-------------------------------------------------|---------|------------------------|---------|
| Gene ID                        | LdBPK_240007400.1 |         | LdBPK_320042200.1 |         | LdBPK_320005900.1                       |         | LdBPK_350008700.1                               |         | LdBPK_350045600.1      |         |
| SNP position on the chromosome | Ld24:65742        |         | Ld32:1398170      |         | Ld32:32369                              |         | Ld35:108596                                     |         | Ld35:1591295           |         |
| Protein                        | hypothetical, con |         | hypothetical, con |         | NLI interacting factor-like phosphatase |         | ATP-dependent DEAD-box RNA helicase%2C putative |         | 4E-interacting protein |         |
| Changes (REF/ALT)              | T/G => Stop       |         | C/G=> Ala/Gly     |         | A/G => Cys/Arg                          |         | C/T => Ser/Phe                                  |         | A/T => Stop            |         |
|                                | DNA seq           | RNA seq | DNA seq           | RNA seq | DNA seq                                 | RNA seq | DNA seq                                         | RNA seq | DNA seq                | RNA seq |
| ProM (I) R22                   | 8/0               | -       | 13/0              | -       | 2/0                                     | -       | 5/4                                             | -       | 16/0                   | -       |
| ProM (P) Sandfly 1             | 39/0              | -       | 56/0              | -       | 52/0                                    | -       | 41/0                                            | -       | 49/0                   | -       |
| ProM (P) Sandfly 2             | 65/0              | -       | 95/0              | -       | 44/0                                    | -       | 66/0                                            | -       | 108/0                  | -       |
| ProM (P) Sandfly 3             | 16/0              | 6/0     | 13/0              | 43/0    | 14/0                                    | 98/0    | 17/0                                            | 260/1   | 14/0                   | 22/0    |
|                                |                   |         |                   |         |                                         |         |                                                 |         |                        |         |
| ProM (P) Sandfly 3             | 16/0              | 6/0     | 13/0              | 43/0    | 14/0                                    | 98/0    | 17/0                                            | 260/1   | 14/0                   | 22/0    |
| aM (P/sf) P1 Hamster           | 2/0               | 14/0    | ./.               | 60/0    | 2/0                                     | 96/0    | 2/0                                             | 303/0   | ./.                    | 25/0    |
|                                |                   |         |                   |         |                                         |         |                                                 |         |                        |         |
| ProM (I) R20                   | 64/0              | 13/0    | 79/0              | 56/0    | 37/0                                    | 108/0   | 70/31                                           | 329/175 | 151/0                  | 58/0    |
| aM P3 Hamster                  | 20/35             | 11/7    | 29/33             | 30/32   | 32/32                                   | 58/69   | 27/28                                           | 178/148 | 28/13                  | 5/5     |
| aM P4 Hamster                  | 7/11              | 4/4     | 7/6               | 10/7    | 7/12                                    | 13/18   | 3/7                                             | 46/49   | 9/5                    | 4/4     |
|                                |                   |         |                   |         |                                         |         |                                                 |         |                        |         |
| aM P4 Hamster                  | 7/11              | 4/4     | 7/6               | 10/7    | 7/12                                    | 13/18   | 3/7                                             | 46/49   | 9/5                    | 4/4     |
| ProM (A) Sandfly 4             | 3/0               | -       | 0/1               | -       | 0/1                                     | -       | ./.                                             | -       | 0/2                    | -       |
| ProM (A) Sandfly 5             | 2/0               | -       | 1/2               | -       | 2/2                                     | -       | 1/0                                             | -       | 2/2                    | -       |
| ProM (A) Sandfly 6             | 5/1               | 1/1     | 2/6               | 2/2     | 1/1                                     | 3/10    | 5/2                                             | 26/25   | 4/3                    | 0/3     |
|                                |                   |         |                   |         |                                         |         |                                                 |         |                        |         |
| aM P4 Hamster                  | 7/11              | 4/4     | 7/6               | 10/7    | 7/12                                    | 13/18   | 3/7                                             | 46/49   | 9/5                    | 4/4     |
| ProM (A) R3                    | 23/16             | 5/4     | 19/19             | 30/27   | 14/15                                   | 56/86   | 15/11                                           | 192/198 | 14/16                  | 13/6    |
| ProM (A) R10                   | 8/10              | 3/3     | 19/8              | 20/22   | 8/10                                    | 58/74   | 8/7                                             | 137/134 | 11/10                  | 9/7     |

Table S2B
