# Supplementary material for: Modulation of Aneuploidy in Leishmania donovani during Adaptation to Different In Vitro and In Vivo Environments and Its Impact on Gene Expression
Source: PubMed Central journal article supplement (PMC5442457; doi:10.1128/mbio.00599-17), 2017-05-23
Supplement: mbo003173320st3.pdf [file mbo003173320st3.pdf]

| <b>BPK282</b>              |                       |                       |                       |                         |                                 |                                 |                       |                       |                       |
|----------------------------|-----------------------|-----------------------|-----------------------|-------------------------|---------------------------------|---------------------------------|-----------------------|-----------------------|-----------------------|
| Sample                     | ProM (P)<br>Sandfly 1 | ProM (P)<br>Sandfly 2 | ProM (P)<br>Sandfly 3 | aM (P/sf) P1<br>Hamster | aM P3<br>Hamster                | aM P4<br>Hamster                | ProM (A)<br>Sandfly 1 | ProM (A)<br>Sandfly 2 | ProM (A)<br>Sandfly 3 |
| Compare to                 | ProM (I) R22          |                       |                       | ProM (P)<br>Sandfly 3   | ProM (I) R20                    |                                 | aM P4 Hamster         |                       |                       |
| Total number of chromosome | 2                     | 2                     | 2                     | 1                       | 8                               | 8                               | 0                     | 0                     | 0                     |
| - Increasing S-value       | 0                     | 0                     | 0                     | 0                       | 1 (8)                           | 1 (8)                           | -                     | -                     | -                     |
| - Decreasing S-value       | 2 (33,35)             | 2 (33,35)             | 2 (33,35)             | 1 (16)                  | 7 (5, 9, 16, 23,<br>26, 33, 35) | 7 (5, 9, 16, 23,<br>26, 33, 35) | -                     | -                     | -                     |
| Sample                     | ProM (A)<br>R3        | ProM (A)<br>R10       |                       |                         |                                 |                                 |                       |                       |                       |
| Compare to                 | aM P4 Hamster         |                       |                       |                         |                                 |                                 |                       |                       |                       |
| Total number of chromosome | 0                     | 0                     |                       |                         |                                 |                                 |                       |                       |                       |
| - Increasing S-value       | -                     | -                     |                       |                         |                                 |                                 |                       |                       |                       |
| - Decreasing S-value       | -                     | -                     |                       |                         |                                 |                                 |                       |                       |                       |

| <b>BPK275</b>              |                             |                             |                             | <b>Ld1S</b>                |                         |                         |                            |                            |                            |                            |
|----------------------------|-----------------------------|-----------------------------|-----------------------------|----------------------------|-------------------------|-------------------------|----------------------------|----------------------------|----------------------------|----------------------------|
| Sample                     | 275ProM<br>(P) Sandfly<br>1 | 275ProM<br>(P) Sandfly<br>2 | 275ProM<br>(P) Sandfly<br>3 | 275aM (P/sf)<br>P1 Hamster | 1SProm (P)<br>Sandfly 1 | 1SProm (P)<br>Sandfly 2 | 1SProm<br>(P)<br>Sandfly 3 | 1SProm<br>(A)<br>Sandfly 1 | 1SProm<br>(A)<br>Sandfly 2 | 1SProm<br>(A)<br>Sandfly 3 |
| Compare to                 | 275ProM (I) R33             |                             |                             | 275ProM (P)<br>Sandfly 2   | 1SProm (I) R22          |                         |                            | 1SaM P15 Hamster           |                            |                            |
| Total number of chromosome | 7                           | 5                           | 7                           | 2                          | 0                       | 0                       | 0                          | 0                          | 0                          | 0                          |
| - Increasing S-value       | 2 (20, 26)                  | 2 (20, 26)                  | 2 (20, 26)                  | 0                          | -                       | -                       | -                          | -                          | -                          | -                          |
| - Decreasing S-value       | 5 (2, 8, 16,<br>23, 33)     | 3 (2, 8, 33)                | 5 (2, 8, 16,<br>23, 33)     | 2 (33, 35)                 | -                       | -                       | -                          | -                          | -                          | -                          |
