# Supplementary material for: Modulation of Aneuploidy in Leishmania donovani during Adaptation to Different In Vitro and In Vivo Environments and Its Impact on Gene Expression
Source: PubMed Central journal article supplement (PMC5442457; doi:10.1128/mbio.00599-17), 2017-05-23
Supplement: mbo003173320st4.pdf [file mbo003173320st4.pdf]

|                       |                           | Length | r      | r*r    | P-v      |
|-----------------------|---------------------------|--------|--------|--------|----------|
| 275ProM (I) R33       | 275ProM (I) R33 RNA       | 35     | 0.6166 | 0.3802 | 8.00E-05 |
| 275ProM (P) Sandfly 2 | 275ProM (P) Sandfly 2 RNA | 35     | 0.6384 | 0.4076 | 3.68E-05 |
| 275aM (P/sf) P1       | 275aM (P/sf) P1 RNA       | 35     | 0.818  | 0.6691 | 1.98E-09 |
| ProM (I) R20          | ProM (I) R20 RNA          | 35     | 0.668  | 0.4462 | 1.16E-05 |
| aM P3 Hamster         | aM P3 Hamster RNA         | 35     | 0.6694 | 0.448  | 1.10E-05 |
| aM P4 Hamster         | aM P4 Hamster RNA         | 35     | 0.6508 | 0.4235 | 2.31E-05 |
| ProM (A) R3           | ProM (A) R3 RNA           | 35     | 0.2569 | 0.066  | 1.36E-01 |
| ProM (A) R10          | ProM (A) R10 RNA          | 35     | 0.447  | 0.1998 | 7.10E-03 |
| ProM (P) Sandfly 3    | ProM (P) Sandfly 3 RNA    | 35     | 0.6954 | 0.4836 | 3.54E-06 |
| aM (P/sf) P1          | aM (P/sf) P1 RNA          | 35     | 0.7292 | 0.5317 | 6.77E-07 |
| ProM (A) Sandfly 3    | ProM (A) Sandfly 3 RNA    | 35     | 0.5197 | 0.2701 | 1.38E-03 |
