# Supplementary material for: Modulation of Aneuploidy in Leishmania donovani during Adaptation to Different In Vitro and In Vivo Environments and Its Impact on Gene Expression
Source: PubMed Central journal article supplement (PMC5442457; doi:10.1128/mbio.00599-17), 2017-05-23
Supplement: mbo003173320st5.pdf [file mbo003173320st5.pdf]

| Chromosome | All coding units* | Outliers | % of outliers | Up | Down |
|------------|-------------------|----------|---------------|----|------|
| Ld05       | 162               | 27       | 17%           | 27 | 0    |
| Ld08       | 137               | 23       | 17%           | 22 | 1    |
| Ld09       | 168               | 26       | 15%           | 18 | 8    |
| Ld16       | 177               | 31       | 18%           | 22 | 9    |
| Ld23       | 200               | 25       | 13%           | 22 | 3    |
| Ld26       | 283               | 38       | 13%           | 29 | 9    |
| Ld33       | 378               | 56       | 15%           | 46 | 10   |
| Ld35       | 546               | 98       | 18%           | 73 | 25   |

\*=All coding units whose depth ratio is defined.
