# Supplementary material for: Modulation of Aneuploidy in Leishmania donovani during Adaptation to Different In Vitro and In Vivo Environments and Its Impact on Gene Expression
Source: PubMed Central journal article supplement (PMC5442457; doi:10.1128/mbio.00599-17), 2017-05-23
Supplement: mbo003173320st6.pdf [file mbo003173320st6.pdf]

|                                   | <b>Up-regulated in promastigotes</b> | <b>Up-regulated in amastigotes</b> |
|-----------------------------------|--------------------------------------|------------------------------------|
| GO annotation with p-value <0.05  | 372/589 (63.15%)                     | 91/261 (34.9%)                     |
| Acid phosphatase                  | 4 (0.68%)                            | 0                                  |
| ATP binding                       | 3 (0.51%)                            | 0                                  |
| ATP metabolism                    | 17 (2.88%)                           | 0                                  |
| Heat-shock protein binding        | 0                                    | 2 (0.76%)                          |
| Heme binding                      | 5 (0.85%)                            | 0                                  |
| Lipid                             | 11 (1.87%)                           | 1 (0.38%)                          |
| - Ergosterol + Phospholipid       | 4 (0.68%)                            | 0                                  |
| - Fatty acid metabolism           | 3 (0.51%)                            | 0                                  |
| - Lipid metabolism                | 3 (0.51%)                            | 1 (0.38%)                          |
| L-methionine salvage              | 4 (0.68%)                            | 0                                  |
| Metabolic process                 | 16 (2.72%)                           | 0                                  |
| Microtubule                       | 9 (1.53%)                            | 0                                  |
| Nucleic acid                      | 17 (2.89%)                           | 19 (7.28%)                         |
| - DNA binding                     | 3 (0.51%)                            | 0                                  |
| - DNA repair                      | 0                                    | 1 (0.38%)                          |
| - DNA replication                 | 3 (0.51%)                            | 1 (0.38%)                          |
| - RNA binding                     | 11 (1.87%)                           | 13 (5%)                            |
| - RNA processing                  | 0                                    | 4 (1.53%)                          |
| Nucleosome assembly               | 15 (2.55%)                           | 1 (0.38%)                          |
| Oxidation-Reduction               | 7 (1.19%)                            | 2 (0.76%)                          |
| Protein                           | 80 (13.6%)                           | 9 (3.45%)                          |
| - Protein folding                 | 27 (4.6%)                            | 1 (0.38%)                          |
| - Protein binding                 | 11 (1.88%)                           | 5 (1.91%)                          |
| - Post translational modification | 10 (1.7%)                            | 3 (1.15%)                          |
| - Proteasome                      | 10 (1.7%)                            | 0                                  |
| - Proteolysis                     | 22 (3.74%)                           | 0                                  |
| Response to ROS                   | 9 (1.53%)                            | 0                                  |
| Sugar                             | 14 (2.38%)                           | 0                                  |
| - Carbohydrate metabolism         | 10 (1.7%)                            | 0                                  |
| - Glucose metabolism              | 3 (0.51%)                            | 0                                  |
| - Gluconeogenesis                 | 1 (0.17%)                            | 0                                  |
| Transcription                     | 0                                    | 3 (1.15%)                          |
| Translation                       | 17 (2.89%)                           | 5 (1.91%)                          |
| Transport                         | 9 (1.53%)                            | 4 (1.53%)                          |
